# Supplementary material for: An evaporation-induced tri-consistent assembly route towards nitrogen-doped carbon microfibers with ordered mesopores for high performance supercapacitors
Source: Royal Society of Chemistry journal article supplement (doi:10.1039/c4cp05211k), 2015-01-01
Supplement: c4cp05211k1.pdf [file c4cp05211k1.pdf]

# Supporting Information

## **An Evaporation-induced Tri-consistent Assembly Route towards Nitrogen-doped Carbon Microfibers with Ordered Mesopores for High Performance Supercapacitors**

Ruili Liu,<sup>a</sup> Lixia Pan,<sup>a</sup> Li Wan,<sup>a</sup> and Dongqing Wu<sup>b</sup>

<sup>a</sup>Department of Chemical Engineering, School of Environment and Chemical Engineering, Shanghai  
University, Shangda Road 99, 200444, Shanghai, P. R.

<sup>b</sup>School of Chemistry and Chemical Engineering, Shanghai Jiao Tong University, Dongchuan Road 800,  
200240, Shanghai, P. R. China

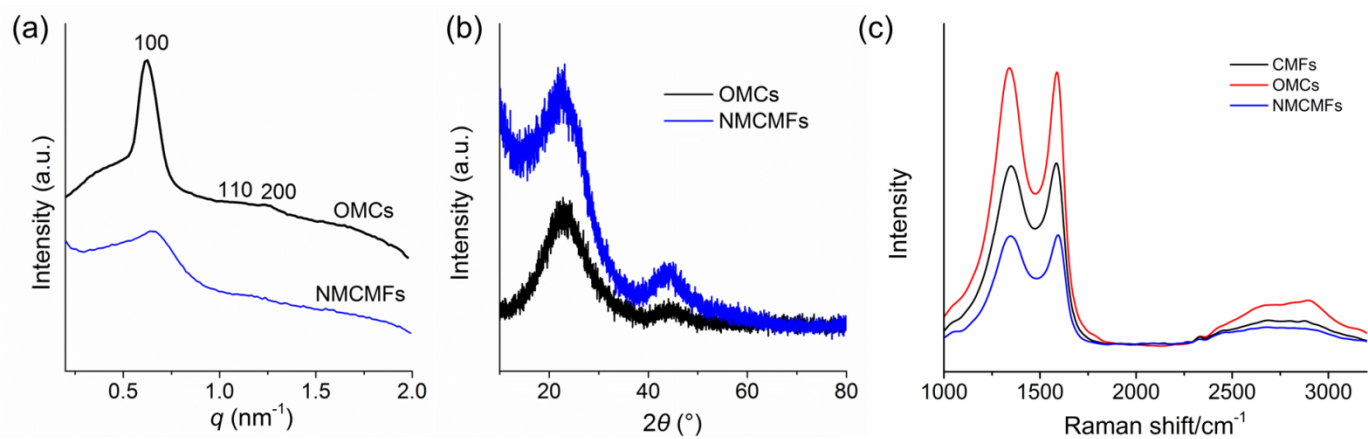

**Figure S1.** (a) SAXS, (b) Wide-angle XRD and Raman spectra of CMFs, OMCs and NMCMFs.

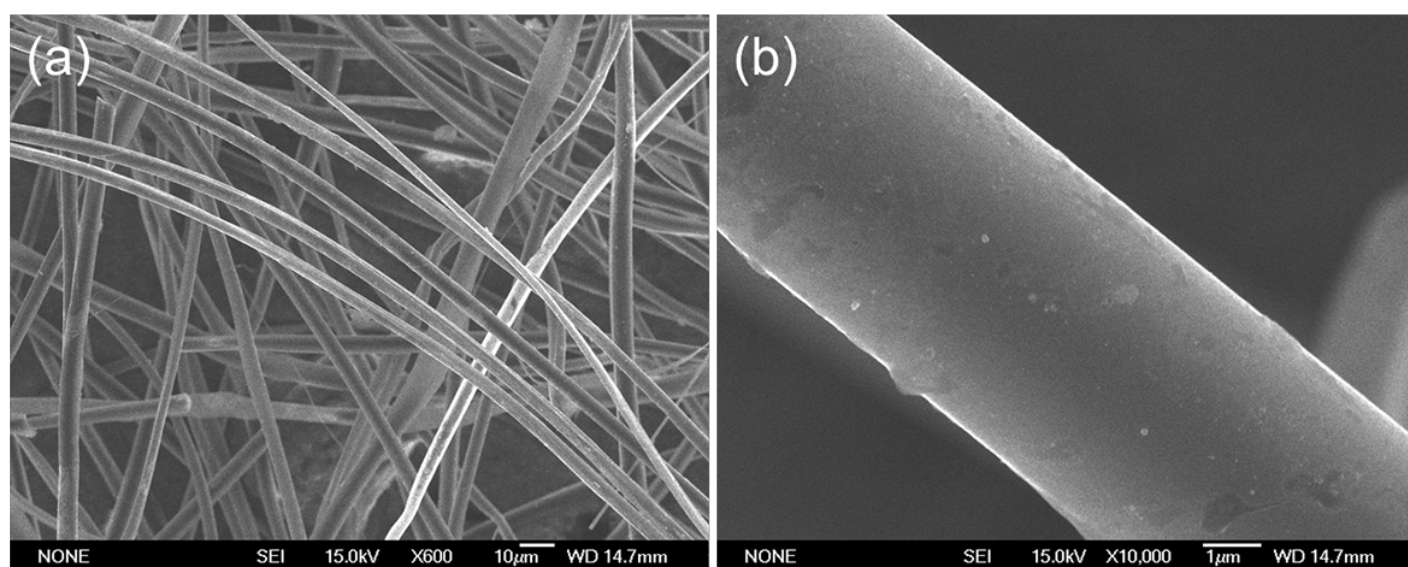

**Figure S2.** SEM image of CMFs.

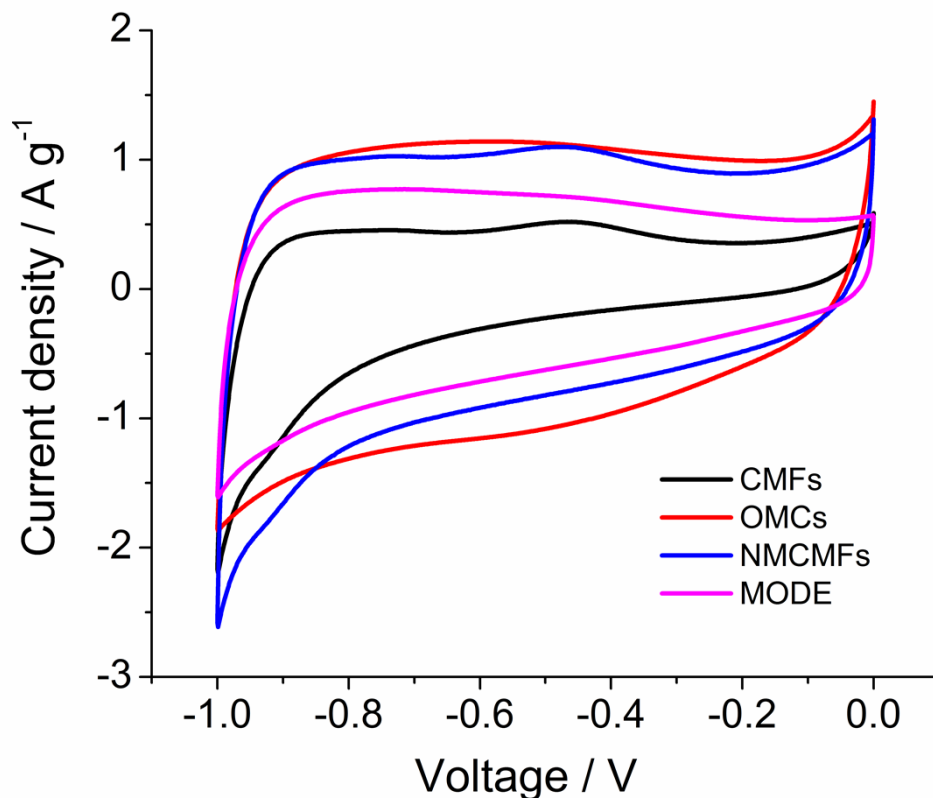

**Figure S3.** CV curves of the CMFs, OMCs, NMCMFs and MODE at scan rate of  $5 \text{ mV s}^{-1}$ .

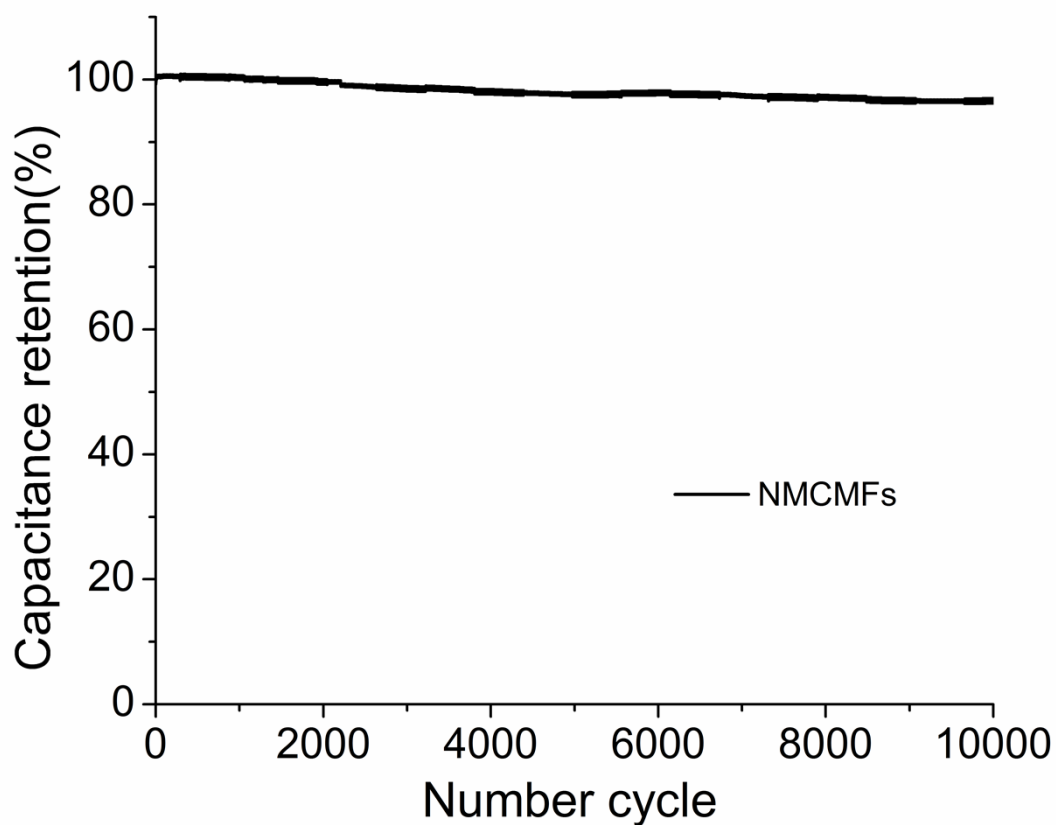

**Figure S4.** Cycling stability of NMCMFs at scan rate of  $100 \text{ mV s}^{-1}$

**Table S1.** Surface Properties, chemical composition and electrochemical properties of OMCs, CMFs and NMCMFs

| Sample | S <sub>BET</sub><br>(m <sup>2</sup> /g) | N <sub>XPS</sub><br>wt% | N-5<br>(%) | N-6<br>(%) | N-Q<br>(%) | N-X<br>(%) | Capacitance<br>(F/g) | Durability<br>% |
|--------|-----------------------------------------|-------------------------|------------|------------|------------|------------|----------------------|-----------------|
| OMCs   | 2470                                    | 0                       | -          | -          | -          | -          | 202                  | 80              |
| CMFs   | 0.7                                     | 3.56                    | 14.94      | 17.68      | 51.62      | 16.06      | 85                   | 89              |
| NMCMFs | 230                                     | 4.52                    | 13.61      | 17.75      | 53.68      | 14.96      | 189                  | 90              |
